# Supplementary material for: Extracellular Polymeric Substances and Biocorrosion/Biofouling: Recent Advances and Future Perspectives
Source: MDPI journal article supplement (doi:10.3390/ijms23105566), 2022-05-16
Supplement: s1 [file s1]

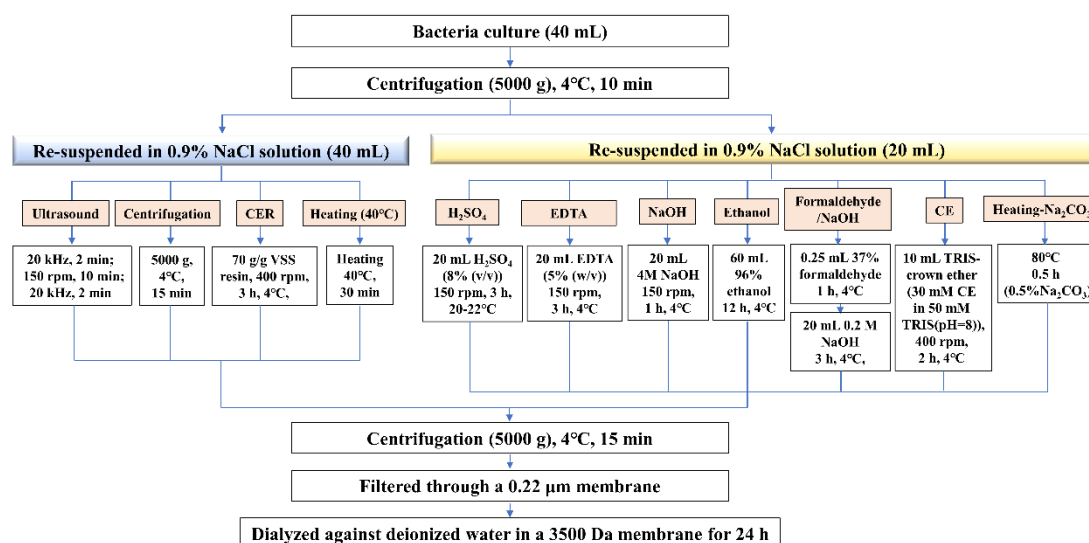

Figure S1. Procedures of different EPS extraction methods.

Table S1. Comparison of different EPS extraction methods.

| Extraction Method                        | Extraction Sources                                                                                                                                   | Degree of cell lysis | EPS content compared to centrifugation and ultrasound <sup>‡</sup> | Ref.    |
|------------------------------------------|------------------------------------------------------------------------------------------------------------------------------------------------------|----------------------|--------------------------------------------------------------------|---------|
| Heating (40 °C)                          | <i>Shewanella oneidensis</i> MR-1/ <i>Geobacter sulfurreducens</i> PCA and <i>Geobacter soli</i> GSS01                                               | Low                  | High                                                               | [1,2]   |
| H <sub>2</sub> SO <sub>4</sub>           | <i>Shewanella oneidensis</i> MR-1/anaerobic ammonium oxidation                                                                                       | High                 | Relatively high                                                    | [1,3]   |
| EDTA                                     | <i>Shewanella oneidensis</i> MR-1/activated sludge/anaerobic ammonium oxidation/ <i>Geobacter sulfurreducens</i> PCA and <i>Geobacter soli</i> GSS01 | Low                  | Relatively high (humic substance and DNA)                          | [1,2,4] |
| NaOH                                     | <i>Shewanella oneidensis</i> MR-1                                                                                                                    | High                 | Relatively high                                                    | [1]     |
| Formaldehyde/ NaOH                       | activated sludge/anaerobic ammonium oxidation                                                                                                        | Low                  | Relatively high (carbohydrate, protein and uronic acid)            | [3,4]   |
| CER                                      | <i>Shewanella oneidensis</i> MR-1/activated sludge/anaerobic ammonium oxidation                                                                      | Low                  | high                                                               | [3–5]   |
| CE                                       | activated sludge                                                                                                                                     | Low                  | Relatively high (carbohydrate, protein and uronic acid)            | [4]     |
| Ethanol                                  | activated sludge                                                                                                                                     | Low                  | Relatively low                                                     | [4]     |
| Heating -Na <sub>2</sub> CO <sub>3</sub> | anaerobic ammonium oxidation                                                                                                                         | Low                  | High (proteins)                                                    | [3]     |

<sup>‡</sup>: In parentheses are the relative benefits of the method for extracting certain components of EPS.

## References

- Dai, Y.-F.; Xiao, Y.; Zhang, E.-H.; Liu, L.-D.; Qiu, L.; You, L.-X.; Mahadevan, G. D.; Chen, B.-L.; Zhao, F., Effective methods for extracting extracellular polymeric substances from *Shewanella oneidensis* MR-1. *Water Sci. Technol.* **2016**, *74*, 2987–2996.

2. Yang, G. Q.; Lin, J.; Zeng, E. Y.; Zhuang, L., Extraction and characterization of stratified extracellular polymeric substances in *Geobacter* biofilms. *Bioresour. Technol.* **2019**, *276*, 119-126.
3. Feng, C. J.; Lotti, T.; Lin, Y. M.; Malpei, F., Extracellular polymeric substances extraction and recovery from anammox granules: Evaluation of methods and protocol development. *Chem. Eng. J.* **2019**, *374*, 112-122.
4. Zhang, L.; Geng, J.; Ding, L.; Ren, H., Inorganic fractions in extracellular polymeric substance extracted from activated sludge and biofilm samples by different methods. *Water Sci. Technol.* **2012**, *66*, 1203-1211.
5. Li, S.-W.; Sheng, G.-P.; Cheng, Y.-Y.; Yu, H.-Q., Redox properties of extracellular polymeric substances (EPS) from electroactive bacteria. *Sci. Rep.* **2016**, *6*, 39098.
